# Supplementary material
Source: PubMed Central journal article supplement (PMC8141270)
Supplement: mmc1.pdf [file mmc1.pdf]

**e-Figure 1. Theoretical phases of COVID-19 disease course.**

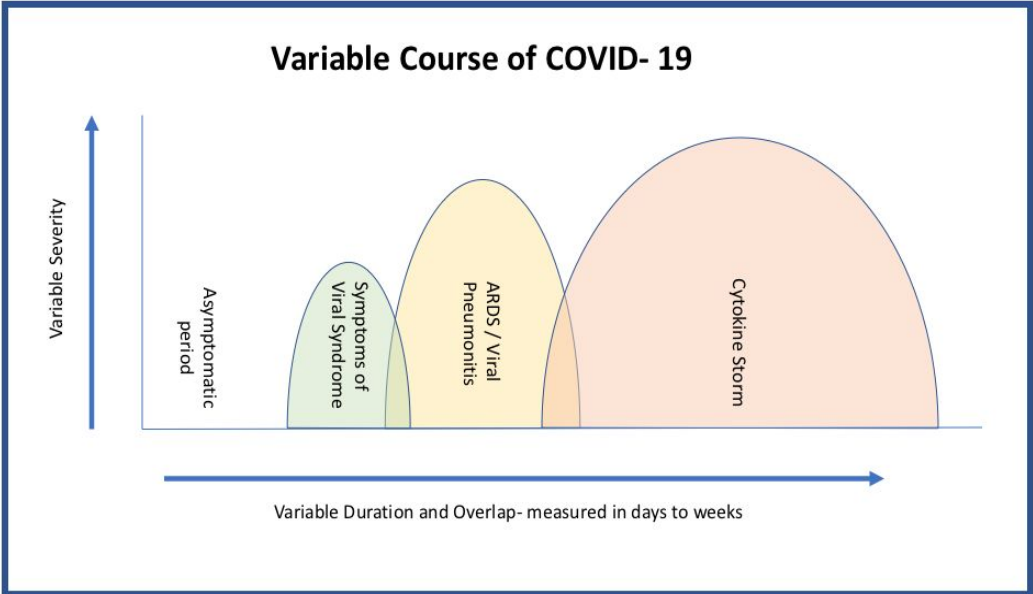

e-Figure 2. Calibration plot of the severe COVID-19 prediction model.

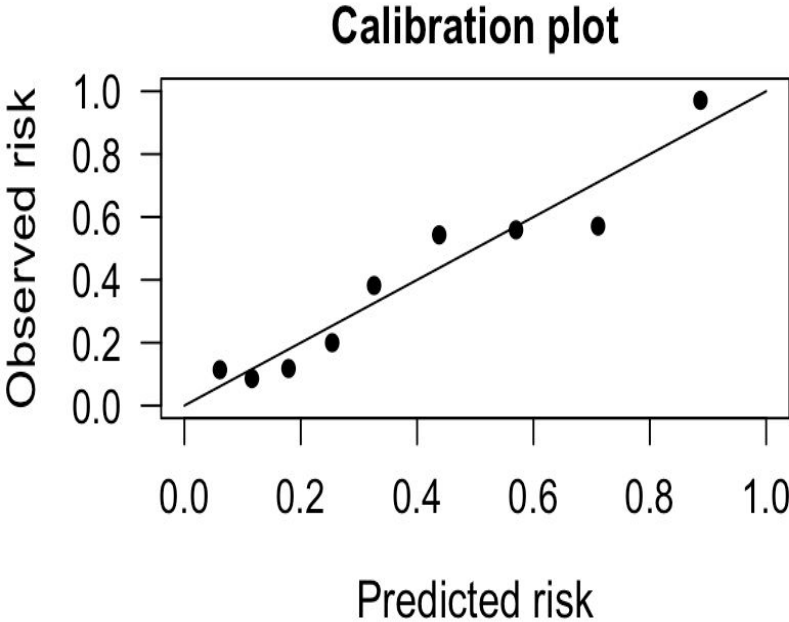

e-Figure 3. Mobile web-based severe COVID-19 risk model.

COVID-19 Model

### COVID-19 Risk Prediction Model

COVID-19 Risk of severe infection

\* Probability of intensive care unit admissions, mechanical ventilation, death within 14 days of hospitalization

Age :

Sex :

Dyspnea:

Diabetes:

Troponin (HsTroponin>19ng/L, Troponin I>=0.04ng/mL):

Liver function (AST, IU/L):

C-Reactive Protein (mg/dL):

D-Dimer (ng/mL):

COVID-19 Model

### Result

**14-Day Risk of severe COVID-19: 25.3%**

**14-Day Risk of Death: 4.2%**

\* Severe COVID-19: defined by intensive care unit (ICU) admission(s), use of mechanical ventilation, and/or death within 14 days of hospitalization.

**e-Table 1. Adjusted odds ratio of severe COVID-19 predictors in multivariable logistic regression. All patients (n=415)**

|                                                                            | Coefficient | SE    | P-value | Adjusted odds ratio |
|----------------------------------------------------------------------------|-------------|-------|---------|---------------------|
| Age                                                                        | 0.0396      | 0.009 | <0.0010 | 1.04 (1.02-1.06)    |
| Sex (Male)                                                                 | 1.0871      | 0.256 | <0.0010 | 2.97 (1.8-4.9)      |
| Dyspnea                                                                    | 0.5857      | 0.267 | 0.029   | 1.8 (1.06-3.03)     |
| Diabetes                                                                   | 0.8512      | 0.25  | 0.001   | 2.34 (1.43-3.83)    |
| C-reactive protein (mg/dL)<br>(reference:0-5)                              |             |       |         |                     |
| 5.1-15                                                                     | 0.6071      | 0.267 | 0.023   | 1.84 (1.09-3.1)     |
| >15                                                                        | 1.5951      | 0.359 | <0.0010 | 4.93 (2.44-9.97)    |
| Aspartate aminotransferase<br>(IU/L) >80                                   | 1.2934      | 0.418 | 0.002   | 3.65 (1.61-8.27)    |
| D-dimer (ng/mL)<br>(reference: 0-300 ng/mL)                                |             |       |         |                     |
| 300.1-1000                                                                 | 0.2766      | 0.324 | 0.394   | 1.32 (0.7-2.49)     |
| >1000                                                                      | 1.0899      | 0.416 | 0.009   | 2.97 (1.32-6.72)    |
| Elevated troponin<br>(HsTroponin T > 19ng/L, or<br>Troponin I ≥ 0.04ng/mL) | 0.3395      | 0.263 | 0.196   | 1.4 (0.84-2.35)     |

**e-Table 2. Adjusted odds ratio of 14-day mortality predictors in multivariable logistic regression. All patients (n=415)**

|                                                                            | Coefficient | SE    | P value | Adjusted odds ratio |
|----------------------------------------------------------------------------|-------------|-------|---------|---------------------|
| Intercept                                                                  | -9.1357     | 1.115 | 0       |                     |
| Age                                                                        | 0.0748      | 0.013 | <0.001  | 1.08 (1.05-1.11)    |
| Sex (Male)                                                                 | 0.8878      | 0.304 | 0.004   | 2.43 (1.34-4.41)    |
| Dyspnea                                                                    | 0.491       | 0.322 | 0.128   | 1.63 (0.87-3.07)    |
| Diabetes                                                                   | 0.9207      | 0.299 | 0.002   | 2.51 (1.4-4.51)     |
| C-reactive protein (mg/dL)<br>(reference:0-5)                              |             |       |         |                     |
| 5.1-15                                                                     | 0.2484      | 0.334 | 0.457   | 1.28 (0.67-2.47)    |
| >15                                                                        | 0.6274      | 0.395 | 0.113   | 1.87 (0.86-4.06)    |
| Aspartate aminotransferase<br>(IU/L) >80                                   | 0.8525      | 0.424 | 0.045   | 2.35 (1.02-5.39)    |
| D-dimer (ng/mL)<br>(reference: 0-300 ng/mL)                                |             |       |         |                     |
| 300.1-1000                                                                 | 0.582       | 0.461 | 0.207   | 1.79 (0.73-4.42)    |
| >1000                                                                      | 0.9579      | 0.51  | 0.06    | 2.61 (0.96-7.08)    |
| Elevated troponin<br>(HsTroponin T > 19ng/L, or<br>Troponin I ≥ 0.04ng/mL) | 0.6267      | 0.302 | 0.038   | 1.87 (1.04-3.38)    |
